# Supplementary material for: Rapid cellular uptake of citrate-coated iron oxide nanoparticles unaffected by cell-surface glycosaminoglycans
Source: Royal Society of Chemistry journal article supplement (doi:10.1039/d4na00277f), 2024-01-01
Supplement: d4na00277f6.pdf [file d4na00277f6.pdf]

Tabulated MPS results for Figure 2

| Time (s) | $\Delta A5/A3$ (%) |                 |
|----------|--------------------|-----------------|
|          | THP-1 in PBS       | Conditioned PBS |
| 1        | 8,66               | 2,64            |
| 5        | 13,01              | 2,63            |
| 11       | 14,54              | 2,72            |
| 27       | 15,22              | 2,75            |
| 44       | 15,76              | 2,80            |
| 80       | 16,11              | 2,877           |
| 147      | 16,31              | 2,92            |
| 254      | 16,41              | 3,26            |
| 441      | 16,37              | 3,55            |
| 667      | 16,25              | 3,77            |

Tabulated MPS results for Figure 5

| Time (s) | $\Delta A5/A3$ (%) |                          |
|----------|--------------------|--------------------------|
|          | THP-1              | THP-1 + 10 $\mu$ M ChABC |
| 1        | 6,38               | 7,853                    |
| 5        | 11                 | 11,42                    |
| 11       | 10,2               | 10,4                     |
| 27       | 10,8               | 11,29                    |
| 44       | 10,9               | 11                       |
| 80       | 11                 | 11,31                    |
| 147      | 10,7               | 10,99                    |
| 254      | 10,5               | 10,66                    |
| 441      | 10,3               | 10,45                    |
| 667      | 10,1               | 10,22                    |

Tabulated MPS results for Figure 6

| Time (s) | $\Delta A5/A3$ (%) |                |
|----------|--------------------|----------------|
|          | THP-1              | THP-1 + 1U HyA |
| 1        | 8,83               | 8,468          |
| 5        | 7,94               | 6,92           |
| 11       | 9,45               | 9,263          |
| 27       | 8,15               | 9,088          |
| 44       | 9,58               | 9,943          |
| 80       | 9,56               | 10,04          |
| 147      | 9,4                | 9,973          |
| 254      | 9,26               | 9,843          |
| 441      | 9,05               | 9,665          |
| 667      | 8,96               | 9,555          |

Tabulated MPS results for Figure7

| Time (s) | $\Delta A5/A3$ (%) |          |
|----------|--------------------|----------|
|          | CHO-K1             | psgA-745 |
| 1        | 10,71              | 8,87     |
| 5        | 11,93              | 11,05    |
| 11       | 12,5               | 11,92    |
| 27       | 13,04              | 12,82    |
| 44       | 13,45              | 13,41    |
| 80       | 14                 | 14,13    |
| 147      | 14,51              | 14,82    |
| 254      | 14,9               | 15,39    |
| 441      | 15,2               | 15,85    |
| 667      | 15,32              | 16,08    |

Tabulated MPS results for supplementary Figure S2

| Time (s) | $\Delta A5/A3$ (%)  |         |                          |                           |
|----------|---------------------|---------|--------------------------|---------------------------|
|          | Chondroitin sulfate | Heparin | Hyaluronic acid (low MW) | Hyaluronic acid (high MW) |
| 1        | -0,34               | -0,28   | -0,12                    | -0,14                     |
| 5        | 0,01                | -0,33   | 0,303                    | 0,1                       |
| 11       | -0,06               | -0,14   | -0,03                    | -0,03                     |
| 27       | -0,27               | -0,25   | 0,107                    | -0,08                     |
| 44       | 0,02                | -0,11   | 0,137                    | -0,02                     |
| 80       | 0,01                | -0,1    | 0,097                    | -0,08                     |
| 147      | 0,003               | -0,13   | 0,09                     | -0,09                     |
| 254      | -0,01               | -0,13   | 0,087                    | -0,09                     |
| 441      | 0,013               | -0,14   | 0,067                    | -0,12                     |
| 667      | 0,023               | -0,11   | 0,11                     | -0,09                     |
