# Supplementary figures and images for: Rapid cellular uptake of citrate-coated iron oxide nanoparticles unaffected by cell-surface glycosaminoglycans
Source: Royal Society of Chemistry journal article supplement (doi:10.1039/d4na00277f), 2024-01-01

SynC 10 min (1 $\mu$ L)

Control

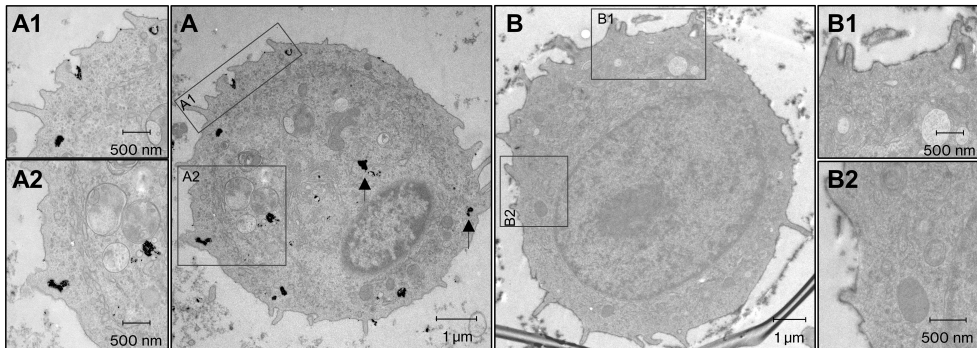

Supplement: d4na00277f2.pdf [file d4na00277f2.pdf]

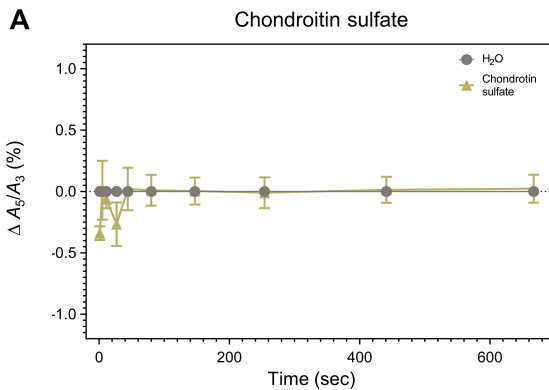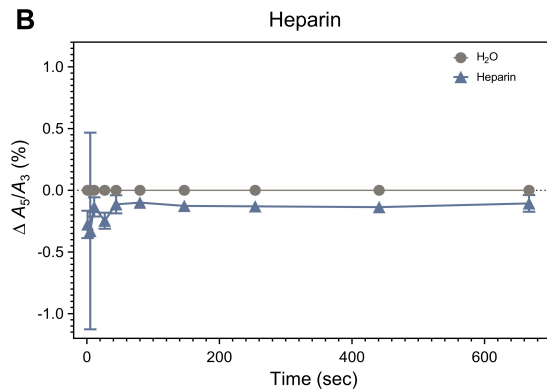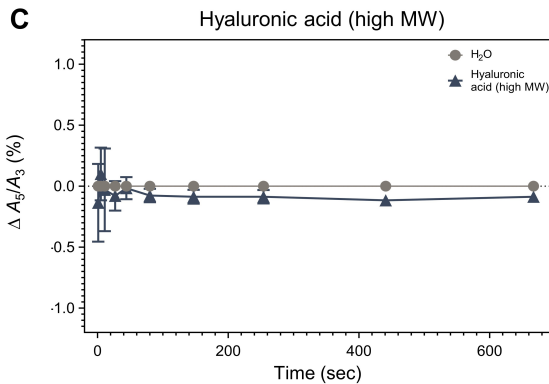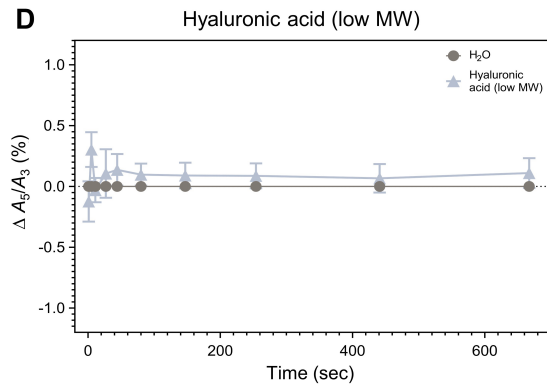

Supplement: d4na00277f3.pdf [file d4na00277f3.pdf]

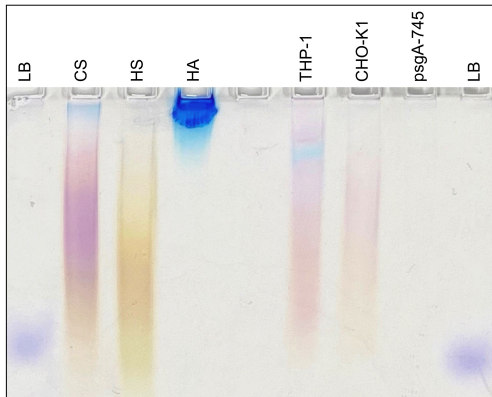

Supplement: d4na00277f4.pdf [file d4na00277f4.pdf]

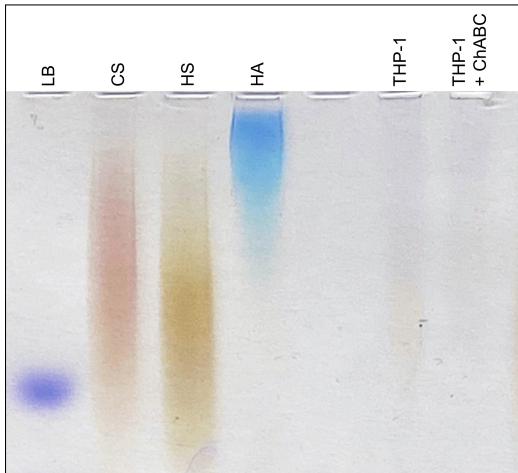

Supplement: d4na00277f5.pdf [file d4na00277f5.pdf]
